# Supplementary material for: Influenza vaccination coverage of health care workers: a cross-sectional study based on data from a Swiss gynaecological hospital
Source: PubMed Central journal article supplement (PMC6301741; doi:10.3205/id000037), 2018-02-23
Supplement: ID-06-02-s-001.pdf [file ID-06-02-s-001.pdf]

## Questionnaire

### 1. What is your job role?

doctor  
nurse  
midwife  
medical student, apprentice, practical student  
non-medical personnel

### 2. Do you have direct contact with patients?

yes  
no

### 3. Are you male or female?

male  
female

### 4. In which year were you born?

### 5. Do you work full time or part time?

full time  
part time  $\geq 50\%$   
part time  $< 50\%$

### 6. Were you vaccinated against influenza in the season 2014/2015?

yes. Please go to Question 7, 8 and 10  
no. Please go to Question 9 and 10

### 7. Where were you vaccinated?

in the staff immunisation clinic  
at a general practice or other doctor  
I ordered the vaccination and vaccinated myself  
other (please clarify)

### 8. What are good reasons to be vaccinated?

to protect myself  
to protect my family  
to protect my patients  
because everybody else gets vaccinated  
because my boss tells me so  
I have a chronic medical condition  
other reasons (please clarify)

### 9. Why didn't you vaccinate yourself against influenza this year?

it was not offered to me  
I am not aware of the free offer at the cantonal hospital  
it makes me feel unwell  
I cannot have it for medical reasons (e.g. allergy)  
I was sick or not present on the day it was offered  
I do not think this vaccination works  
I do not think I am at risk for influenza  
I do not like needles  
my immune system is strong, I won't get influenza  
Influenza is not dangerous  
I do not trust any vaccinations  
I think vaccinations are important, but I do not think the influenza vaccination is important  
I forgot to get vaccinated  
Other reasons (please clarify)

### 10. Which strategies could improve the influenza vaccination rates?

Improve convenience and accessibility e.g. vaccine availability on ward and during routine multidisciplinary meetings  
Increase knowledge e.g. notices and short presentations  
More marketing strategies e.g. small campaign pins, posters  
More incentives e.g. free coffee during immunisation, awards for the most immunised departments/wards  
No measures necessary  
Others (please clarify)
